# Supplementary material for: Comprehensive evaluation of high-oleic rapeseed (Brassica napus) based on quality, resistance, and yield traits: A new method for rapid identification of high-oleic acid rapeseed germplasm
Source: PLoS One. 2022 Aug 18;17(8):e0272798. doi: 10.1371/journal.pone.0272798 (PMC9387780; doi:10.1371/journal.pone.0272798)
Supplement: S1 Data — (XLSX) [file pone.0272798.s001.xlsx]

## Sheet: Sheet1
		Oleic	Crude protein	Palmitic acid	Stearic acid	Linoleic acid	Linolenic acid	Erucic acid	Oil content	1000-grain weight	Yield per plant	Incidence rate of sclerotinia sclerotiorum	Incidence rate of viral diseases
1	708	82.84	21.69	3.402	0.976	7.2992	2.1556	0	43.25	3.75	18.36	18.5	1.9
2	710	78.36	22.06	2.919	0.928	5.0784	2.8934	0	43.54	3.65	22.41	9.5	1.7
3	991	77.65	24.78	3.416	1.296	6.6144	2.5942	0	46.55	3.95	24.76	10.6	1.8
4	992	81.32	22.02	3.108	0.808	5.8848	2.584	0	48.23	3.81	22.73	8.3	1.6
5		82.86	24.08	3.073	1.192	6.1472	2.7438	0	42.16	3.85	23.07	11.2	1.3
6		84.64	22.77	3.451	1.416	6.8256	2.3698	0	41.96	3.24	18.48	11.6	2.3
7		79.09	25.79	2.772	0.832	6.2304	1.7068	0.01	43.77	3.39	18.62	20.8	1.5
8		85.09	26.15	3.171	1.184	5.3088	2.6282	0	44.14	3.52	21.52	16.6	2.1
9		84.79	20.12	3.255	1.32	6.5952	1.3362	0.02	35.52	3.08	23.48	12.6	1.6
10		80.3	22.01	2.597	1.52	5.7952	1.547	0	40.24	3.21	22.62	16.8	1.6
11		81.02	21.23	3.136	1.472	5.6352	2.0842	0.07	42.01	3.29	21.08	15.7	1.2
12		76.68	18.28	3.696	0.872	5.872	1.8666	0	45.54	3.18	26.52	19.3	1.2
13		83.84	20.75	3.157	1.584	5.9136	1.36	0	43.77	3.23	21.25	25.5	2.3
14		85.21	21.36	3.269	1.536	7.7056	2.21	0.01	41.72	3.78	24.76	29.1	1.5
15		81.88	22.04	3.108	1.456	6.56	2.0026	0.04	45.67	3.44	21.57	17.5	1.7
16		79.29	18.84	3.01	1.248	6.0224	1.4008	0	40.21	3.5	25.87	21.7	1.9
17		80.89	24.37	2.394	0.888	5.2544	1.7476	0	45.18	3.78	22.54	13.1	2.1
18		76.19	15.3	2.884	1.072	3.3696	1.7102	0	43.49	3.62	20.54	17.6	2.1
19		80.84	21.45	3.101	1.472	3.7376	1.9652	0	45.36	3.28	23.23	9.3	1.5
20		83.87	27.74	2.751	0.984	4.1728	2.244	0	44.72	3.14	22.13	12.9	1.4
21		81.11	18.74	2.653	1.384	5.0912	2.8662	0	44.49	3.94	23.24	12.6	2.6
22		76.3	21.98	2.891	1.056	4.4096	2.4072	0	42.66	3.41	26.89	20.8	1.6
23		80.86	19.89	2.73	1.12	3.7952	2.0026	0.05	43.12	3.65	18.51	13.5	1.3
24		81.22	12.27	3.094	1.44	3.632	1.8836	0	43.69	3.73	27.52	16.4	2.2
25		75.86	20.48	2.723	1.36	5.3248	1.4654	0	43.24	3.23	26.56	17.2	1.6
26		78.63	27.21	2.863	1.576	7.552	2.601	0	39.28	3.18	20.96	19.1	1.6
27		83.85	19.63	2.149	1.288	4.0672	2.1556	0	36.54	3.51	20.68	20.1	1.7
28		80.77	21.23	1.925	1.488	5.3472	1.8088	0.23	44.27	3.42	21.21	19.4	1.1
29		75.42	18.46	2.464	0.936	4.2496	2.3052	0.51	42.55	3.24	18.96	18.4	1.3
30		76.66	15.23	3.255	0.92	5.424	1.87	0.14	40.23	3.18	21.49	17.1	2.2
